# Supplementary material
Source: PubMed Central journal article supplement (PMC6196492)
Supplement: pnas.1806305115.sapp.pdf [file pnas.1806305115.sapp.pdf]

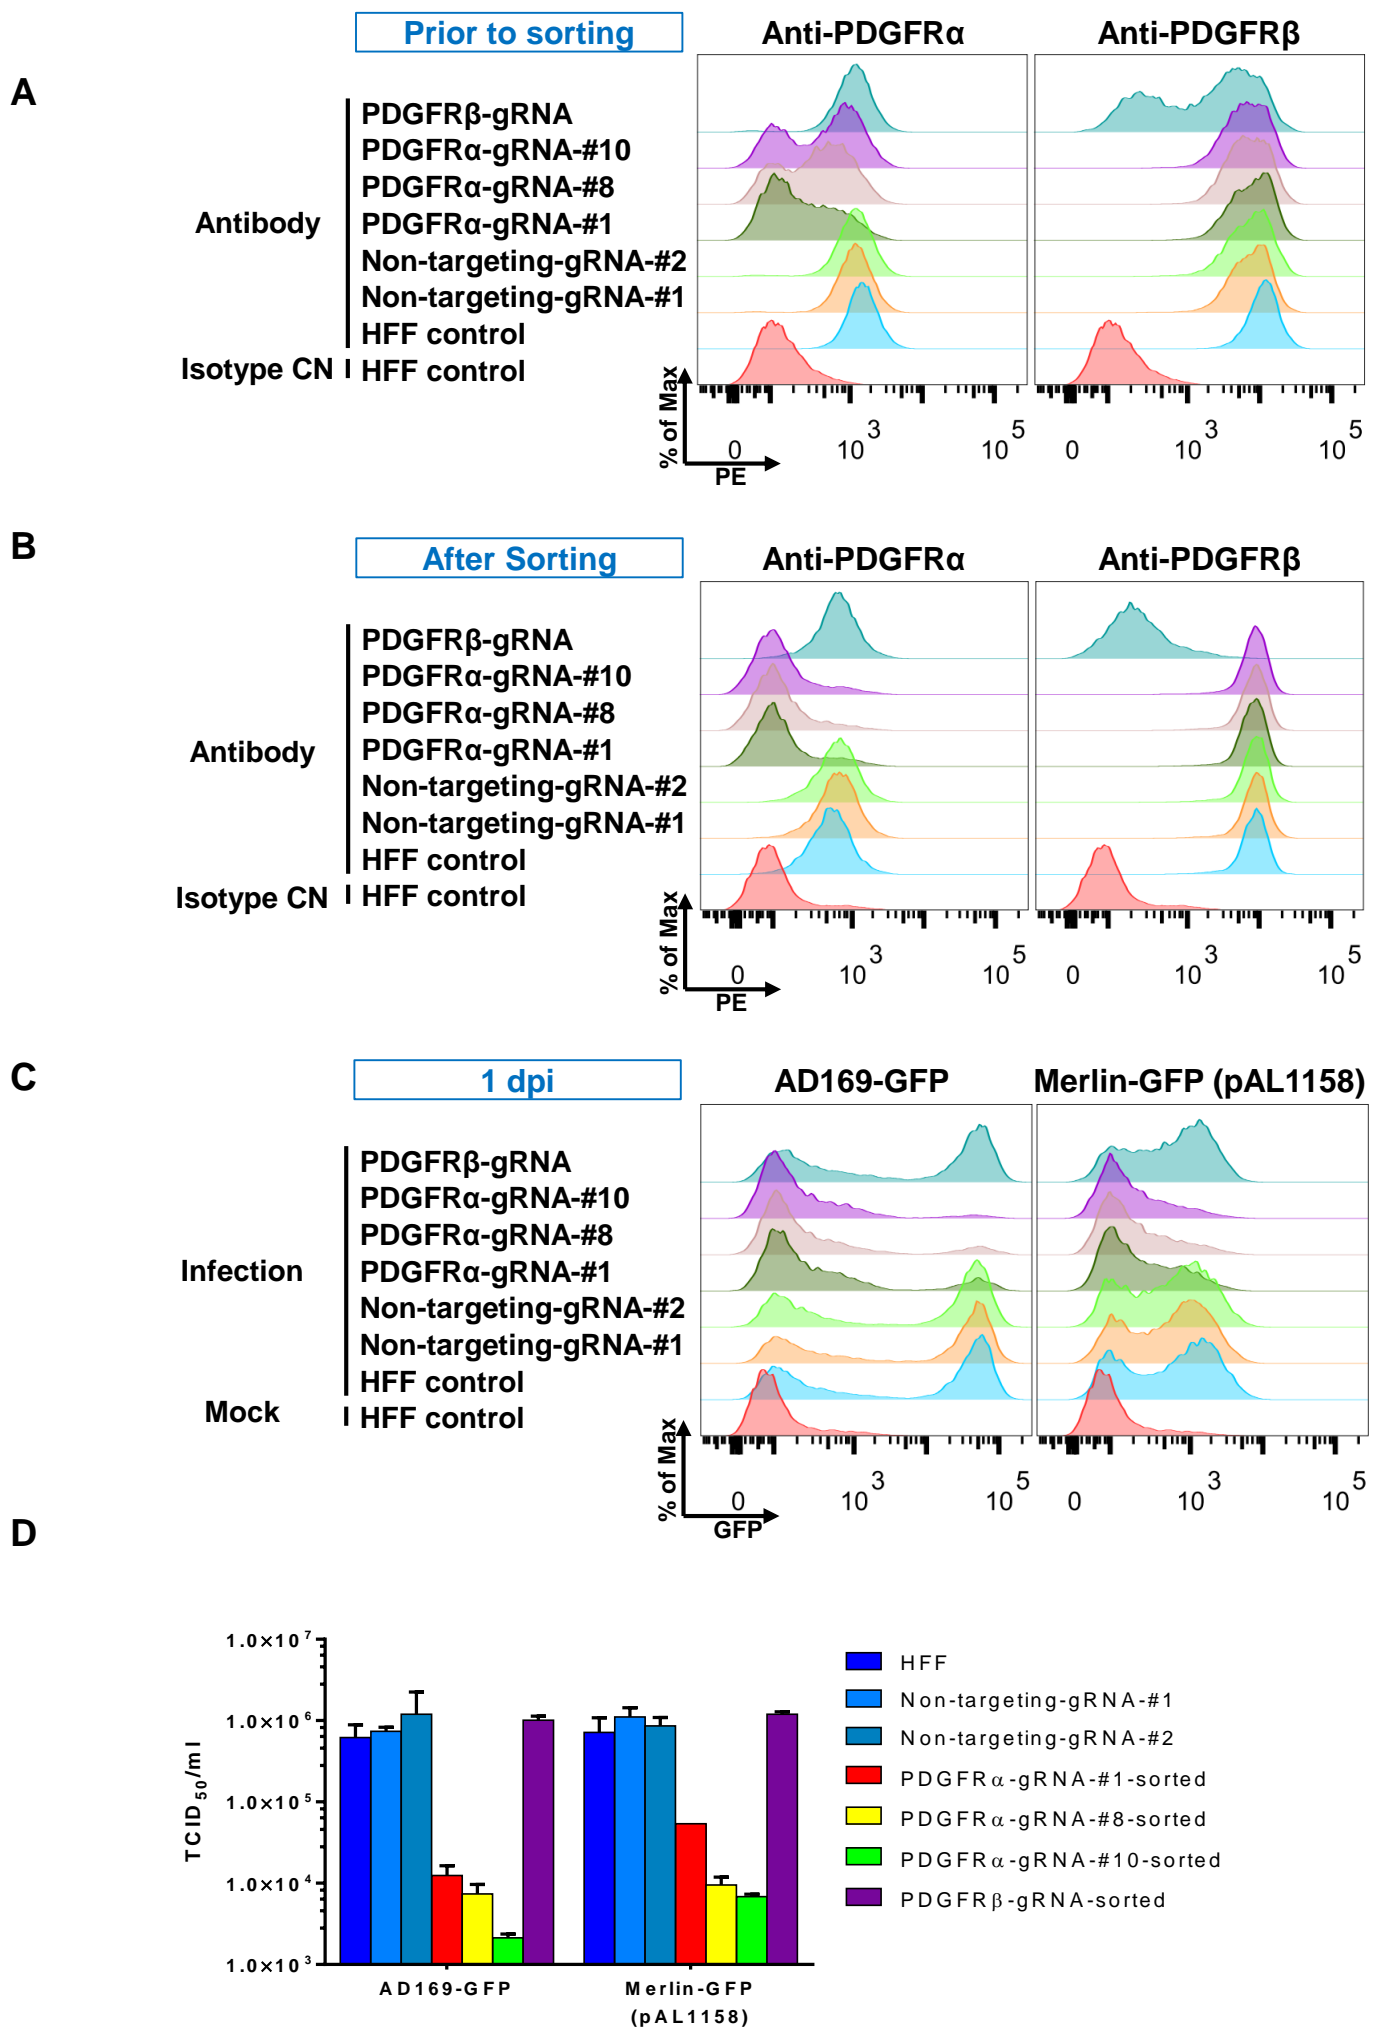

**Fig. S1. PDGFR $\alpha$ , but not PDGFR $\beta$ , is required for trimer-only HCMV infection.** (A) HFF cells were transduced with lentiviruses expressing Cas9 and non-targeting gRNAs, or gRNAs specific for PDGFR $\alpha$  or PDGFR $\beta$ . 14 days after transduction, cell surface staining of PDGFR $\alpha$  and PDGFR $\beta$  was measured prior to sorting by FACS. (B) PDGFR $\alpha$ -low or PDGFR $\beta$ -low populations were sorted by FACS from HFF cells expressing gRNAs against PDGFR $\alpha$  or PDGFR $\beta$  as shown above, and surface staining was performed to confirm the purity of sorted cells. (C) PDGFR $\alpha$ -low, PDGFR $\beta$ -low and control cells were infected by AD169-GFP or Merlin-GFP (pAL1158) at multiplicity of 3 FFU/cell, and GFP expressed from the viral genome was monitored by flow cytometry to determine the percentage of infected cells at 1 dpi. (D) AD169-GFP and Merlin-GFP yields from cells infected in panel C were quantified at 5 dpi. Mean  $\pm$  SD is presented for three biological replicates assayed in triplicate.

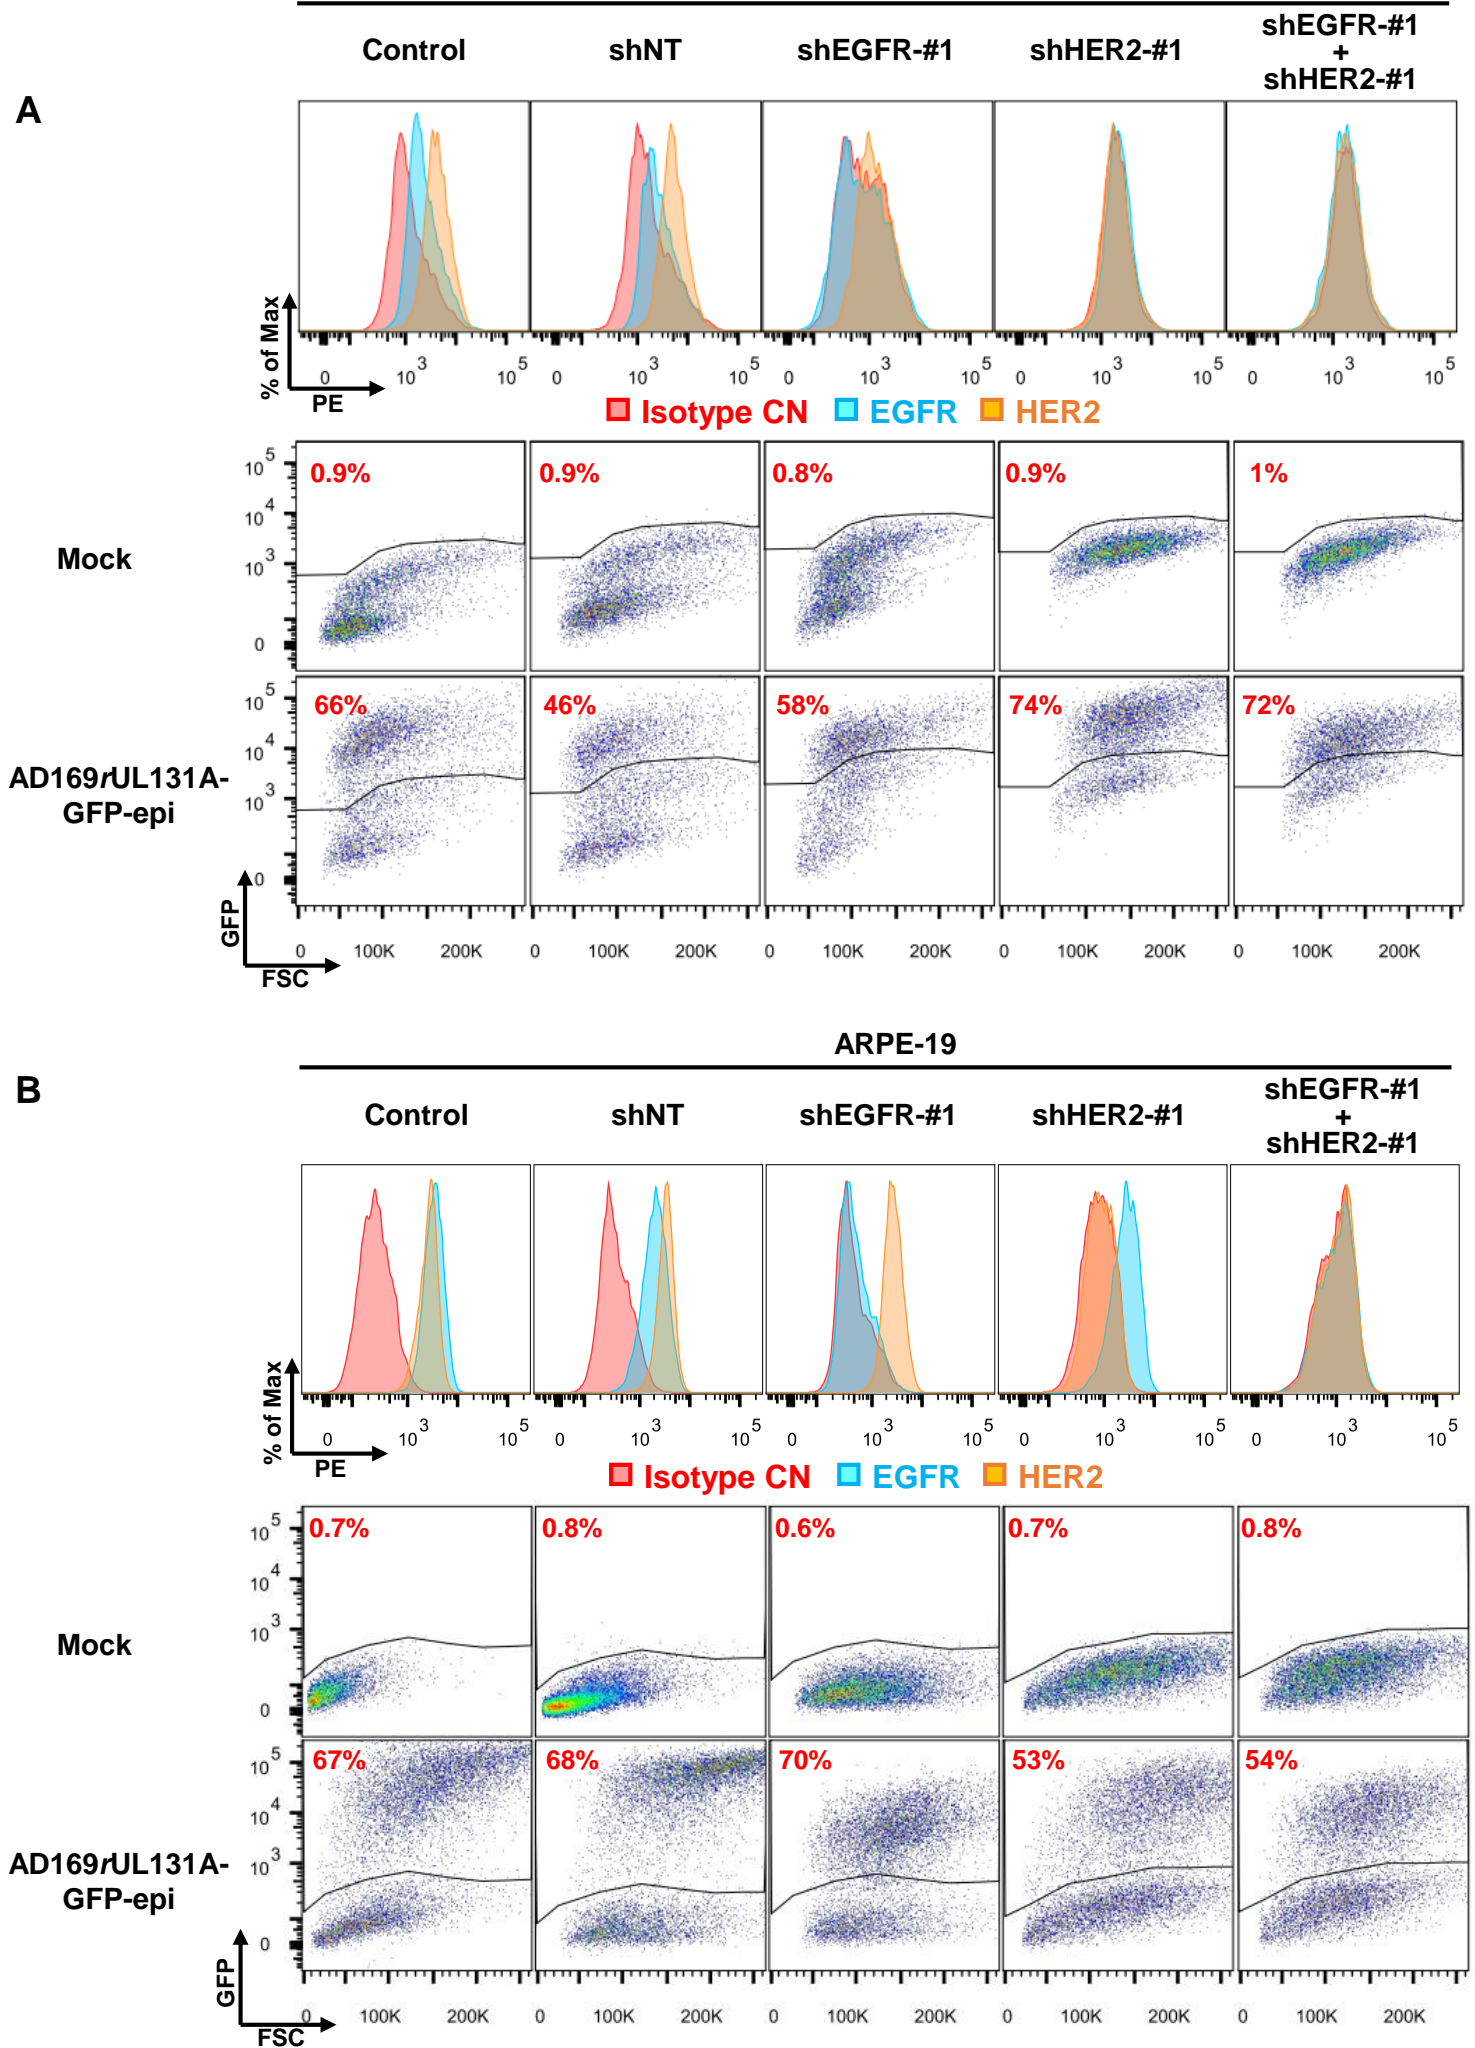

**Fig. S2. EGFR and HER2 are not required for AD169 derivatives containing the pentameric complex to enter PDGFR $\alpha$ -KO fibroblasts or ARPE-19 epithelial cells.** PDGFR $\alpha$ -KO cells (clone 1-10) (A) and ARPE-19 cells (B) were transduced with lentiviruses expressing shRNAs targeting EGFR, HER2 or both. Top panels: Cell surface staining of EGFR and HER2 was performed to confirm the knockdown. Bottom panels: Cells were infected with AD169rUL131A-GFP-epi at a multiplicity of 3 FFU/cell, and GFP expression was measured at 24 hpi to assay the percentage of infected cells. The percentage of IE1-positive cells is labeled in red. Control: cells without lentiviral transduction; shNT: non-targeting shRNA.

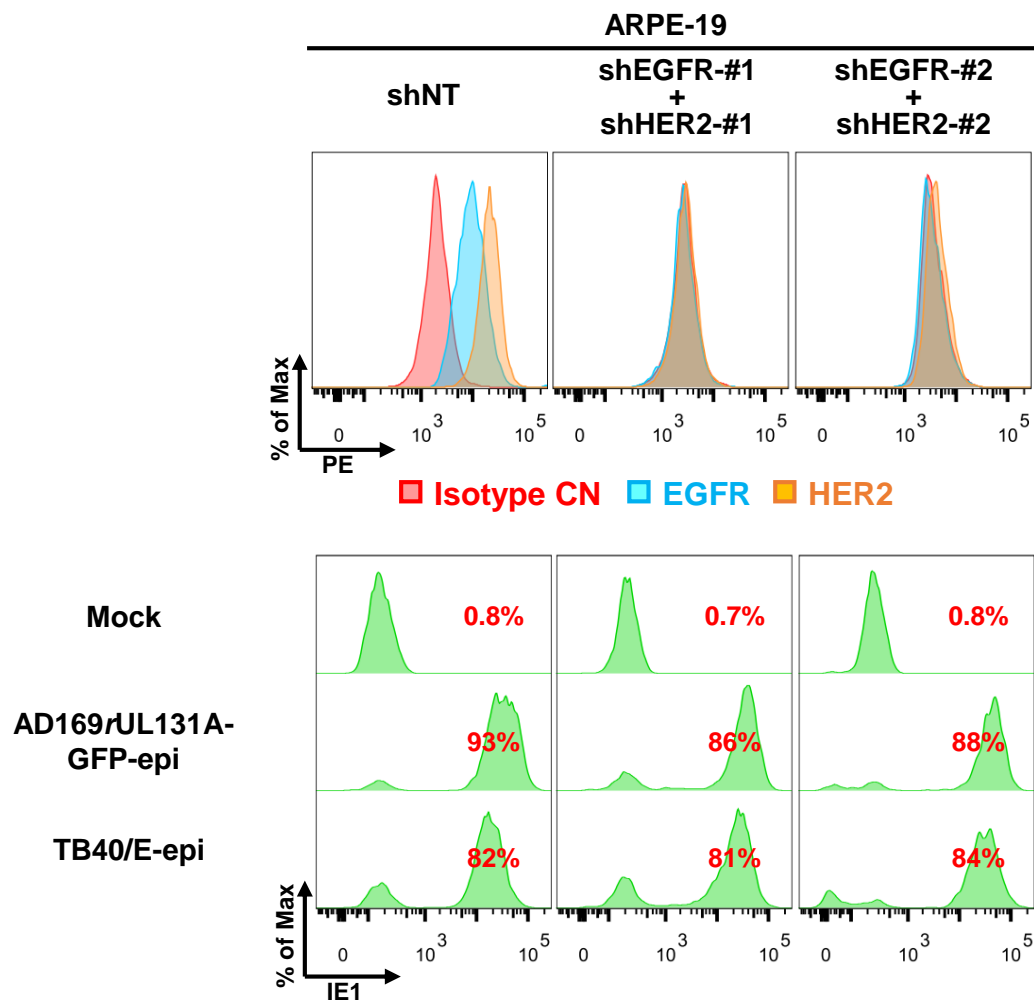

**Fig. S3. EGFR and HER2 are not required for TB40/E to enter ARPE-19 epithelial cells.** ARPE-19 cells were transduced with lentiviruses expressing shRNAs targeting both EGFR and HER2. shRNAs labeled #1 correspond to those used in the experiment reported in figure S2, and shRNAs labeled #2 correspond to the additional set. Top panels: Cell surface staining of EGFR and HER2 was performed to confirm the knockdown. Bottom panels: Cells were infected with AD169rUL131A-GFP-epi or TB40/E-epi at a multiplicity of 3 FFU/cell, and IE1 expression was measured at 24 hpi to assay the percentage of infected cells. The percentage of IE1-positive cells is labeled in red. Control: ARPE-19 cells without lentiviral transduction; shNT: nontargeting shRNA.

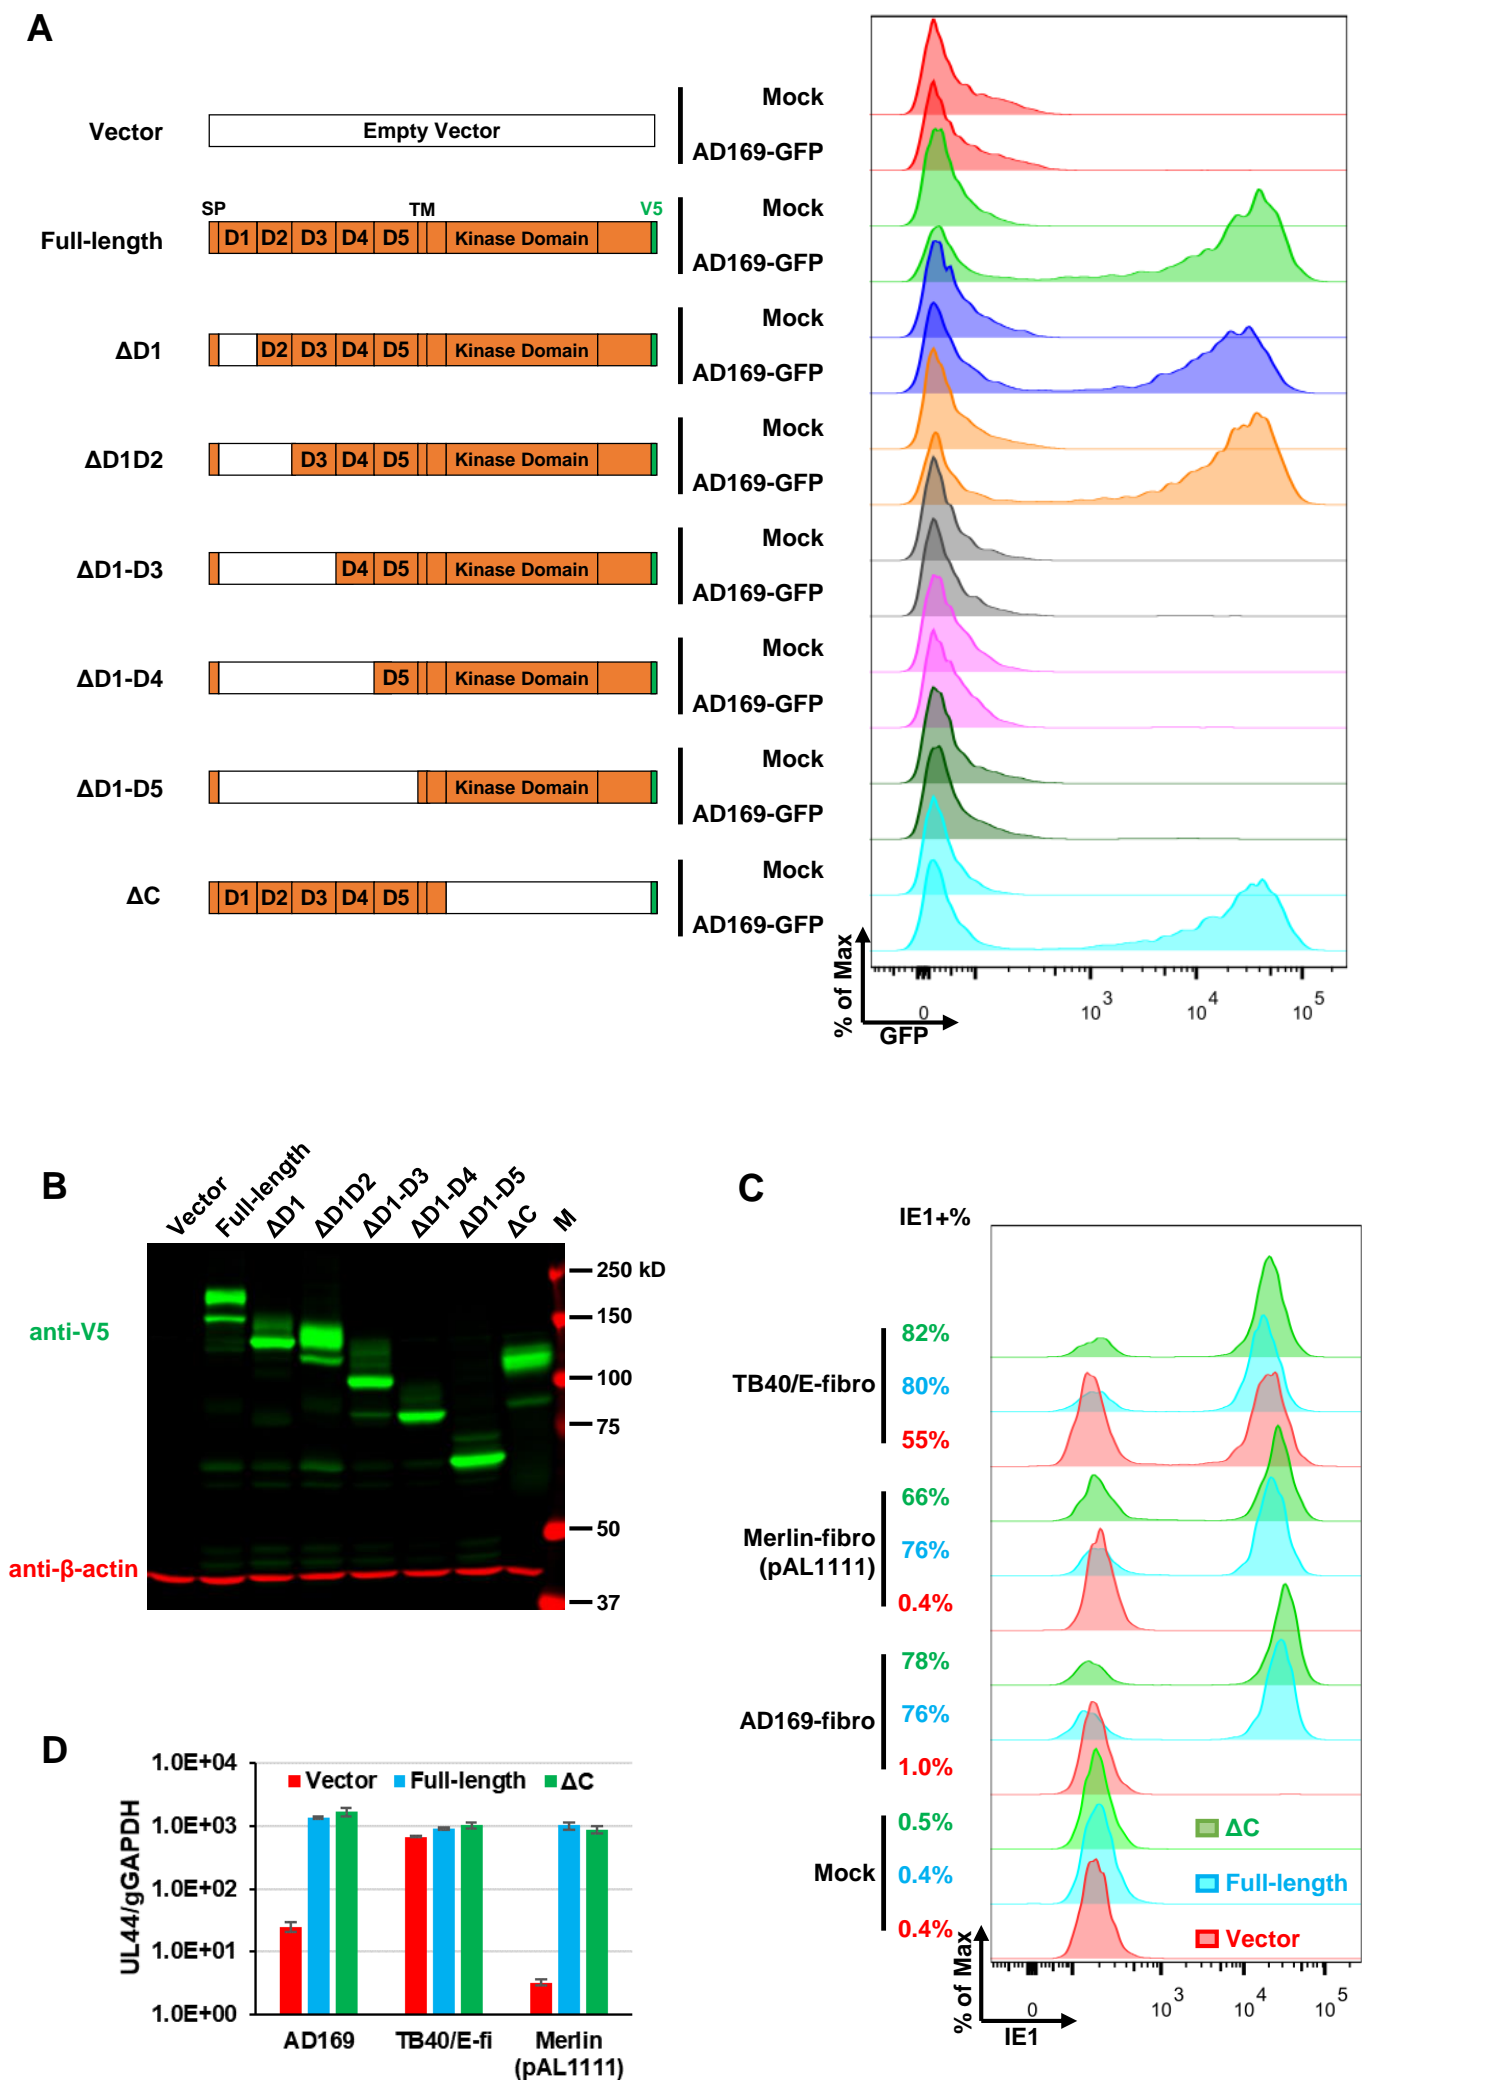

**Fig. S4. IgG-like domain 3, but not the kinase domain, is required for trimer-only HCMV to enter PDGFR $\alpha$ -expressing ARPE-19 cells.** (A) ARPE-19 cells were transduced with lentiviruses expressing V5-tagged, full-length or deleted variants of PDGFR $\alpha$ . Transduced ARPE-19 cells were infected with AD169-GFP at a multiplicity of 3 FFU/cell, and GFP-positive cells were quantified at 24 hpi by flow cytometry. (B) Expression of V5-tagged full length and truncated PDGFR $\alpha$  variants in ARPE-19 was confirmed by western blot. M: protein marker. (C) Transduced ARPE-19 cells were infected with AD169-fibro, Merlin-fibro (pAL1111) or TB40/E-fibro at a multiplicity of 3 FFU/cell, and IE1-positive cells were quantified at 24 hpi by flow cytometry. (D) Viral genomes were quantified in cells infected in (C) at 4 dpi by qPCR using primers specific for the viral UL44 coding region and the cellular GAPDH locus. Mean  $\pm$  SD is presented for three biological replicates assayed in triplicate.

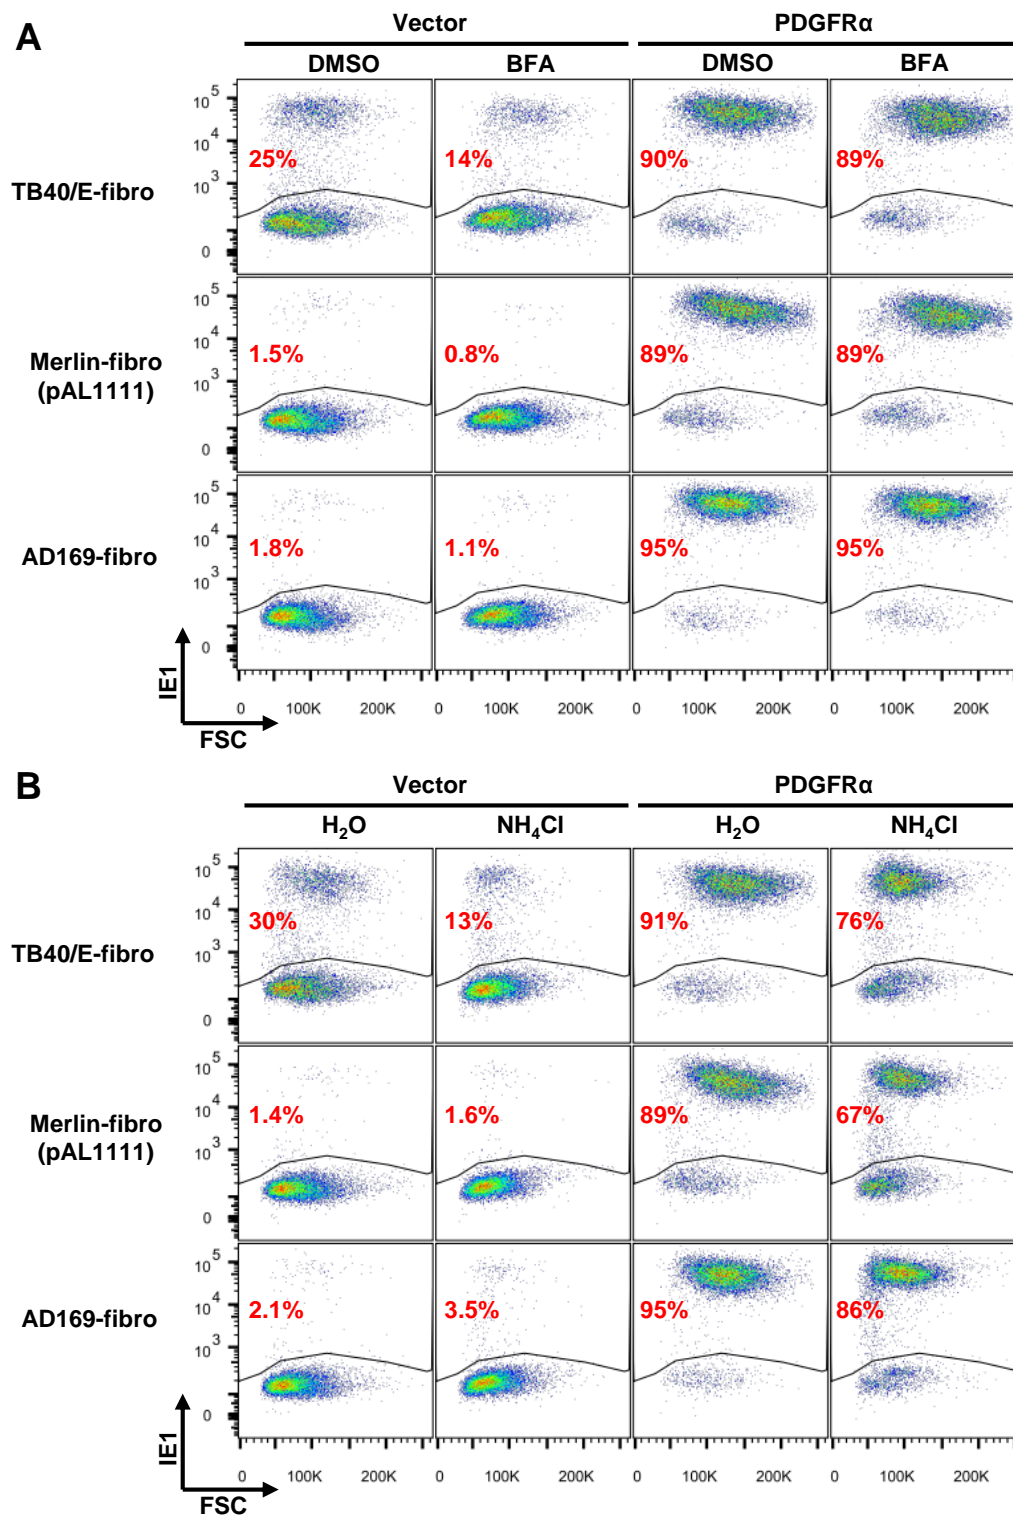

**Fig. S5. Entry of trimer-only virus into PDGFR $\alpha$ -expressing ARPE-19 cells is pH independent.** ARPE-19 cells transduced with lentivirus expressing PDGFR $\alpha$  or empty vector were pre-treated with 40 nM bafilomycin A1 (BFA) (A) or 40  $\mu$ M NH<sub>4</sub>Cl (B) for 1 h prior to infection with TB40/E-fibro, Merlin-fibro, or AD169-fibro at a multiplicity of 3 FFU/cell in the presence of the inhibitor for 1 h at 37°C. Infected cells were cultured with inhibitors and IE1 expression was assayed at 20 hpi to measure the percentage of infected cells. The percentage of IE1-positive cells is labeled in red.

CLUSTAL O(1.2.4) multiple sequence alignment

```
AA91-130      ----- 0
D3-AA202-306  PFNVYALKATSELDLEMEALKTVYKSGETIVVTCAVFNNEVVDLQWTYPGEVKGKGITML 60

AA91-130      -----SAAHTGLYTCYYNHTQTEENELEGRHIYIYVDPDPAFVP 40
D3-AA202-306  EEIKVPSIKLVYTLTVPEATVKDSGDYECARQATREVKEMKKVT----- 105
                .. .* * *  .:  *  :*::
```

**Fig. S6. Amino acid sequence alignment between PDGFR $\alpha$  amino acid 91-130 and IgG-like domain 3 (amino acid 202-306).**

# Table S1

| GeCKO-1st PCR primer     | Sequence                                                                                                           |                                          |                         |        |              |                                                                                      |
|--------------------------|--------------------------------------------------------------------------------------------------------------------|------------------------------------------|-------------------------|--------|--------------|--------------------------------------------------------------------------------------|
| v2Adaptor_F              | AATGGACTATCATATGCTTACCGTAACCTTGAAAGATATTCG                                                                         |                                          |                         |        |              |                                                                                      |
| v2Adaptor_R              | TCTACTATTCTTTCCCTGCACGTtgtagggcagtgtagcctctg                                                                       |                                          |                         |        |              |                                                                                      |
| GeCKO-2nd PCR Primer     | illumina flowcell attachment sequence & illumina sequencing primer sequence                                        | Barcode                                  | Priming site            | Length | Purification | Complete Primer Sequence                                                             |
| F01                      | AATGATACGGCGACCACCGAGATCTACACTCTTTCCCTACACGACGCTCTCCGATCT                                                          | CGATGT                                   | tcttggaaaggacgaaacacg   | 88     | PAGE         | AATGATACGGCGACCACCGAGATCTACACTCTTTCCCTACACGACGCTCTCCGATCTCGATGTcttggaaaggacgaaacacg  |
| F02                      | AATGATACGGCGACCACCGAGATCTACACTCTTTCCCTACACGACGCTCTCCGATCT                                                          | TGACCA                                   | tcttggaaaggacgaaacacg   | 88     | PAGE         | AATGATACGGCGACCACCGAGATCTACACTCTTTCCCTACACGACGCTCTCCGATCTTGACAtcttggaaaggacgaaacacg  |
| F03                      | AATGATACGGCGACCACCGAGATCTACACTCTTTCCCTACACGACGCTCTCCGATCT                                                          | ACAGTG                                   | tcttggaaaggacgaaacacg   | 88     | PAGE         | AATGATACGGCGACCACCGAGATCTACACTCTTTCCCTACACGACGCTCTCCGATCTACAGTcttggaaaggacgaaacacg   |
| F04                      | AATGATACGGCGACCACCGAGATCTACACTCTTTCCCTACACGACGCTCTCCGATCT                                                          | GCCAA                                    | tcttggaaaggacgaaacacg   | 88     | PAGE         | AATGATACGGCGACCACCGAGATCTACACTCTTTCCCTACACGACGCTCTCCGATCTGCCAAAtcttggaaaggacgaaacacg |
| F05                      | AATGATACGGCGACCACCGAGATCTACACTCTTTCCCTACACGACGCTCTCCGATCT                                                          | CAGATC                                   | tcttggaaaggacgaaacacg   | 88     | PAGE         | AATGATACGGCGACCACCGAGATCTACACTCTTTCCCTACACGACGCTCTCCGATCTCAGATcttggaaaggacgaaacacg   |
| F06                      | AATGATACGGCGACCACCGAGATCTACACTCTTTCCCTACACGACGCTCTCCGATCT                                                          | CTTGTA                                   | tcttggaaaggacgaaacacg   | 88     | PAGE         | AATGATACGGCGACCACCGAGATCTACACTCTTTCCCTACACGACGCTCTCCGATCTCTTGAtcttggaaaggacgaaacacg  |
| F07                      | AATGATACGGCGACCACCGAGATCTACACTCTTTCCCTACACGACGCTCTCCGATCT                                                          | ATCAGC                                   | tcttggaaaggacgaaacacg   | 88     | PAGE         | AATGATACGGCGACCACCGAGATCTACACTCTTTCCCTACACGACGCTCTCCGATCTATCAGCcttggaaaggacgaaacacg  |
| F08                      | AATGATACGGCGACCACCGAGATCTACACTCTTTCCCTACACGACGCTCTCCGATCT                                                          | TTAGGC                                   | tcttggaaaggacgaaacacg   | 88     | PAGE         | AATGATACGGCGACCACCGAGATCTACACTCTTTCCCTACACGACGCTCTCCGATCTTTAGGCtcttggaaaggacgaaacacg |
| F09                      | AATGATACGGCGACCACCGAGATCTACACTCTTTCCCTACACGACGCTCTCCGATCT                                                          | ACTTGA                                   | tcttggaaaggacgaaacacg   | 88     | PAGE         | AATGATACGGCGACCACCGAGATCTACACTCTTTCCCTACACGACGCTCTCCGATCTACTTGAtcttggaaaggacgaaacacg |
| F10                      | AATGATACGGCGACCACCGAGATCTACACTCTTTCCCTACACGACGCTCTCCGATCT                                                          | GATCAG                                   | tcttggaaaggacgaaacacg   | 88     | PAGE         | AATGATACGGCGACCACCGAGATCTACACTCTTTCCCTACACGACGCTCTCCGATCTGATCAGtcttggaaaggacgaaacacg |
| F11                      | AATGATACGGCGACCACCGAGATCTACACTCTTTCCCTACACGACGCTCTCCGATCT                                                          | TAGCTT                                   | tcttggaaaggacgaaacacg   | 88     | PAGE         | AATGATACGGCGACCACCGAGATCTACACTCTTTCCCTACACGACGCTCTCCGATCTTAGCTTcttggaaaggacgaaacacg  |
| F12                      | AATGATACGGCGACCACCGAGATCTACACTCTTTCCCTACACGACGCTCTCCGATCT                                                          | GGCTAC                                   | tcttggaaaggacgaaacacg   | 88     | PAGE         | AATGATACGGCGACCACCGAGATCTACACTCTTTCCCTACACGACGCTCTCCGATCTGGCTActtggaaaggacgaaacacg   |
| R01                      | CAAGCAGAAGACGGCATAACGAGAT                                                                                          |                                          | TCTACTATTCTTTCCCTGCACGT | 49     | PAGE         | CAAGCAGAAGACGGCATAACGAGATCTACTATTCTTTCCCTGCACGT                                      |
| Primer Name              | Primer Sequence (gRNA)                                                                                             | Source                                   |                         |        |              |                                                                                      |
| PDGFRa_gRNA_1_Fwd        | CACGGACCTCAATGGACTTACCC                                                                                            | GeCKOv2 library                          |                         |        |              |                                                                                      |
| PDGFRa_gRNA_1_Rev        | AAACGGGTAAGTCCATTGAAGTCC                                                                                           |                                          |                         |        |              |                                                                                      |
| PDGFRa_gRNA_8_Fwd        | CACCGTAAAGCAGGAACCGCGGA                                                                                            | Designed by Desktop Genetics             |                         |        |              |                                                                                      |
| PDGFRa_gRNA_8_Rev        | AAACTCCGGCGTCTCTGGTCTTAGC                                                                                          |                                          |                         |        |              |                                                                                      |
| PDGFRa_gRNA_10_Fwd       | CACCGCGTTTCCCTGACTTATACA                                                                                           | Designed by Desktop Genetics             |                         |        |              |                                                                                      |
| PDGFRa_gRNA_10_Rev       | AAACTGTATAAGTCAGGGAAACCG                                                                                           |                                          |                         |        |              |                                                                                      |
| PDGFRb_gRNA_11_Fwd       | CACCGCATCGACCCCGAAGCGCA                                                                                            | Designed by Desktop Genetics             |                         |        |              |                                                                                      |
| PDGFRb_gRNA_11_Rev       | AAACTCGCGCTTCCGGTGCATGC                                                                                            |                                          |                         |        |              |                                                                                      |
| non-targeting_gRNA_Fwd   | CACCGATCGTTTCCGTTAACGGCG                                                                                           | GeCKOv2 library                          |                         |        |              |                                                                                      |
| non-targeting_gRNA_Rev   | AAACCGCCGTTAAGCGGAAACGATC                                                                                          |                                          |                         |        |              |                                                                                      |
| non-targeting_gRNA_2_Fwd | CACCGCGGAAATTTTACCGACGA                                                                                            | GeCKOv2 library                          |                         |        |              |                                                                                      |
| non-targeting_gRNA_2_Rev | AAACTCGTCGTAATAATTTCCGGCG                                                                                          |                                          |                         |        |              |                                                                                      |
| PDGFRa_gRNA1_Q5_Fwd      | ggacatcctTGAGAAAGTGAAGGCCAAAG                                                                                      |                                          |                         |        |              |                                                                                      |
| PDGFRa_gRNA1_Q5_Rev      | actgcaaatcAACCACTATTGTTAAAAAC                                                                                      |                                          |                         |        |              |                                                                                      |
| Ra-FL-V5_Fwd             | atctggGATCCACCATGGGACTTCCCATCCG                                                                                    |                                          |                         |        |              |                                                                                      |
| Ra-SP-115-V5_Fwd         | atctggGATCCACCATGGGACTTCCCATCCGCGTTCCTGGTCTTAGGCTGTCTCTCACAGGGCTGAGCCTAATCTCTGCAGGCACATTTACATATGTGCCAGAC           |                                          |                         |        |              |                                                                                      |
| Ra-SP-202-V5_Fwd         | atctggGGATCCACCATGGGACTTCCCATCCGCGTTCCTGGTCTTAGGCTGTCTCTCACAGGGCTGAGCCTAATCTCTGCCCATTTAATGTTATGTCTTTAAAAGCAACATCAG |                                          |                         |        |              |                                                                                      |
| Ra-SP-319-V5_Fwd         | atctggGGATCCACCATGGGACTTCCCATCCGCGTTCCTGGTCTTAGGCTGTCTCTCACAGGGCTGAGCCTAATCTCTGCCCATTTAATGTTATGTCTTTAAAAGCAACATCAG |                                          |                         |        |              |                                                                                      |
| Ra-SP-414-V5_Fwd         | atctggGGATCCACCATGGGACTTCCCATCCGCGTTCCTGGTCTTAGGCTGTCTCTCACAGGGCTGAGCCTAATCTCTGCCCATTTAATGTTATGTCTTTAAAAGCAACATCAG |                                          |                         |        |              |                                                                                      |
| Ra-SP-520-V5_Fwd         | atctggGGATCCACCATGGGACTTCCCATCCGCGTTCCTGGTCTTAGGCTGTCTCTCACAGGGCTGAGCCTAATCTCTGCCCATTTAATGTTATGTCTTTAAAAGCAACATCAG |                                          |                         |        |              |                                                                                      |
| Ra-1-592-V5_Rev          | atcgtAACGCGTTTACGTAGAATCGAGACCGAGGAGGGTTAGGGATAGGCTTACCGCCACCCAGGAAGCTGTCTCCACAGG                                  |                                          |                         |        |              |                                                                                      |
| Ra-FL-V5-STOP_Rev        | atcgtAACGCGTTTACGTAGAATCGAGACCGAGGAGGGTTAGGGATAGGCTTACCGCCACCCAGGAAGCTGTCTCCACAGG                                  |                                          |                         |        |              |                                                                                      |
| Ra-FL_Rev                | atctgaACGCGTTTACGTAGAATCGAGACCGAGGAGGGTTAGGGATAGGCTTACCGCCACCCAGGAAGCTGTCTCCACAGG                                  |                                          |                         |        |              |                                                                                      |
|                          |                                                                                                                    |                                          |                         |        |              | <b>Note for Deletion Variant</b>                                                     |
|                          |                                                                                                                    |                                          |                         |        |              | <b>ΔD1 (AAA24-114)</b>                                                               |
|                          |                                                                                                                    |                                          |                         |        |              | <b>ΔD1D2 (AAA24-201)</b>                                                             |
|                          |                                                                                                                    |                                          |                         |        |              | <b>ΔD1-D3 (AAA24-318)</b>                                                            |
|                          |                                                                                                                    |                                          |                         |        |              | <b>ΔD1-D4 (AAA24-413)</b>                                                            |
|                          |                                                                                                                    |                                          |                         |        |              | <b>ΔD1-D5 (AAA24-519)</b>                                                            |
|                          |                                                                                                                    |                                          |                         |        |              | <b>ΔC (AAA593-1089)</b>                                                              |
| shNT_Fwd                 | CCGGCAACAAGATGAAGAGCAACCACTCGAGTTGGTGCTCTCATCTTGTGTTTTG                                                            | Adapted from Sigma Mission shRNA: SHC002 |                         |        |              |                                                                                      |
| shNT_Rev                 | AATTCAAAAACAAGATGAAGAGCAACCACTCGAGTTGGTGCTCTCATCTTGTG                                                              |                                          |                         |        |              |                                                                                      |
| shEGFR_1_Fwd             | CCGGCCACAAGCAGTGAATTTATCTCGAGATAAATCACTGTTTGTGGCTTTTG                                                              | TRCN0000295969                           |                         |        |              |                                                                                      |
| shEGFR_1_Rev             | AATTCAAAAAGCCACAAGCAGTGAATTTATCTCGAGATAAATCACTGTTTGTGGC                                                            |                                          |                         |        |              |                                                                                      |
| shEGFR_2_Fwd             | CCGGCTGGATGATAGACGCAGATACTCGAGTATCTGCTTATCATCCAGCTTTTG                                                             | TRCN0000298822                           |                         |        |              |                                                                                      |
| shEGFR_2_Rev             | AATTCAAAAAGCTGGATGATAGACGCAGATACTCGAGTATCTGCTTATCATCCAGC                                                           |                                          |                         |        |              |                                                                                      |
| shHER2_1_Fwd             | CCGGTGTGAGTATCAGGCTTTGTACTCGAGTCAAAAGCCTGGATACTGACATTTTG                                                           | TRCN0000039878                           |                         |        |              |                                                                                      |
| shHER2_1_Rev             | AATTCAAAAATGTGAGTATCAGGCTTTGTACTCGAGTCAAAAGCCTGGATACTGACA                                                          |                                          |                         |        |              |                                                                                      |
| shHER2_2_Fwd             | CCGGAAATATGTAACCAAGCAGATCTCGAGTCTGGCTGGTTACATATTTCTTTTG                                                            | TRCN0000039882                           |                         |        |              |                                                                                      |
| shHER2_2_Rev             | AATTCAAAAAGATATGTGAACCAAGCAGATCTCGAGTCTGGCTGGTTACATATTT                                                            |                                          |                         |        |              |                                                                                      |
| UL44_F                   | GTGCGGCCCGATTCAATATG                                                                                               | for qPCR                                 |                         |        |              |                                                                                      |
| UL44_R                   | GCCTTCGGCACAATGTCTTGG                                                                                              | for qPCR                                 |                         |        |              |                                                                                      |
| gGAPDH_F                 | CCCACACATGCACCTACC                                                                                                 | for qPCR                                 |                         |        |              |                                                                                      |
| gGAPDH_R                 | CCTAGTCCAGGGCTTTGATT                                                                                               | for qPCR                                 |                         |        |              |                                                                                      |
